# Supplementary material for: Analysis of Key Chemical Components in Aqueous Extract Sediments of Panax Ginseng at Different Ages
Source: MDPI journal article supplement (doi:10.3390/foods11081161), 2022-04-16
Supplement: s1 [file s1]

## Supplementary materials

**Table S1.** Observation of sediment formation of ginseng extract of different ages

| Time<br>(day) | 3years                                                                              | 4years                                                                              | 5years                                                                               | 6years                                                                                |
|---------------|-------------------------------------------------------------------------------------|-------------------------------------------------------------------------------------|--------------------------------------------------------------------------------------|---------------------------------------------------------------------------------------|
| 0             |    |    |    |    |
|               | Slight turbidity, no sediment                                                       | Turbidity, no sediment                                                              | Turbidity, no sediment                                                               | Turbidity, no sediment                                                                |
| 10            |   |   |   |   |
|               | Turbidity, little sediment                                                          | Slight turbidity, much sediment                                                     | Turbidity, little sediment                                                           | Turbidity, little sediment                                                            |
| 20            |  |  |  |  |
|               | Turbidity, much sediment                                                            | Slight turbidity, much sediment                                                     | Slight turbidity, much sediment                                                      | Turbidity, much sediment                                                              |
| 40            |  |  |  |  |
|               | Turbidity, large sediment                                                           | Limpid, large sediment                                                              | Slight turbidity, large sediment                                                     | Limpid, large sediment                                                                |

**Table S2.** PUBCHEM CID number for ginsenosides in this article

| Ginsenosides    | PUBCHEM CID |
|-----------------|-------------|
| Rg <sub>1</sub> | 441923      |
| Re              | 441921      |
| Rf              | 441922      |
| Rb <sub>1</sub> | 9898279     |
| Rc              | 12855889    |
| Rb <sub>2</sub> | 6917976     |
| Rb <sub>3</sub> | 12912363    |
| Rd              | 24721561    |
